# Supplementary material
Source: publisher figshare collection journal article supplement (https://gsajournals.figshare.com/ndownloader/files/11768150)
Supplement: Supplementary file 1 [file 11768150]

id	Row	Plot	ID2	PH	BTF	FTR	ND	FL
1	1	1	8759	99.4	68.35	-1.5	7.5	54
2	1	2	8760	71.95	49.75	1.8	5.5	61.4
3	1	3	8761	91.55	63.2	-1.95	9.5	70.4
4	1	6	8763	NA	NA	NA	NA	64.2
5	1	7	8764	108.95	85.9	7.8	7.5	62.8
6	1	8	8765	106.6	76.65	1.45	7.5	53.2
7	1	9	8766	70.95	49.9	-6.75	9.5	56.4
8	1	10	8767	80.9	65.1	-13.2	8.5	50.4
9	2	1	8768	84.5	63.1	-0.55	8	58.4
10	2	2	8769	87.2	72.55	-10.25	10.5	57.4
11	2	3	8770	71.15	44.9	-8.65	6.5	57
12	2	4	8771	63.7	51.75	-13.8	12.5	82
13	2	5	8772	107.95	94.1	-10.15	11.5	59
14	2	6	8773	101.75	75.35	2.9	7	51.6
15	2	7	8774	104.8	74.25	-9.9	9	65.4
16	2	8	8775	89.1	51.85	17.45	5.5	56.4
17	2	9	8776	97.65	80	-10.25	10	55.2
18	2	10	8777	112.15	69.7	10.35	8.5	56.2
19	3	1	8778	101.6	64.9	10.35	5.5	49
20	3	2	8779	NA	NA	NA	NA	64.6
21	3	3	8780	83.25	50.6	6.95	7	65.6
22	3	4	8781	82.15	42.7	12.4	6	62.2
23	3	5	8782	128.15	96.7	-0.25	9.5	61.2
24	3	6	8783	82.55	50.2	-3.25	7.5	67.6
25	3	7	8784	101.1	70.2	2.3	9	66
26	3	8	8785	77.4	52.8	-12.4	10	64.2
27	3	9	8786	110.05	89.25	-4.3	9.5	61.4
28	3	10	8787	77.65	49.8	3.65	8	64.4
29	4	1	8788	112.5	88.15	-6.5	8	55.2
30	4	2	8789	120.55	80.3	15.5	8	64.4
31	4	3	8790	83.2	53.45	3.7	6	54
32	4	4	8791	97.7	68.4	1.75	8.5	56.2
33	4	5	8792	78	68	-11.8	9	60.2
34	4	6	8793	70.4	53.15	-10.75	8.5	64.8
35	4	7	8794	90.55	55.75	-0.55	9	61
36	4	8	8795	91.2	72.85	-10.5	7.5	50.4
37	4	9	8796	44.95	34	-4.1	8.5	53.4
45	5	2	8798	67.5	42.7	6.15	9.5	68.8
46	5	3	8799	73.35	62.25	-2.3	10	67.6
47	5	4	8800	79.8	49.7	2.45	9.5	70.8
48	5	5	8801	125.4	87.35	11.15	8.5	57.8
49	5	6	8802	121.75	89.95	1.15	6.5	49.2
50	5	7	8803	112.8	93.95	-10.8	9	60.4
51	5	8	8804	83.95	61.1	-5.55	8.5	58.6
52	5	9	8805	84.7	52.7	0.6	9	56
53	5	10	8806	NA	NA	NA	NA	73
54	6	1	8807	104.05	75.2	-3.85	10.5	64.8
55	6	2	8808	98.8	84.2	-9.95	10	57
56	6	3	8809	106.85	71.75	12.2	6	49.2
57	6	5	8811	93.7	75.1	-6.75	8.5	51
58	6	6	8812	106.4	80.1	5.05	8.5	56.4
59	6	7	8813	101.5	57.55	15.45	8.5	57.8
60	6	8	8814	79.85	60.15	-3.3	9	56.8
61	6	9	8815	122.55	89.6	6.45	7.5	51.2
62	6	10	8816	137.95	111.8	-2.75	9.5	53
64	7	3	8818	133.4	103.05	0.05	8.5	57
65	7	4	8819	103.9	74.8	-8.85	8	54.4
66	7	5	8820	90.8	76.9	-9.1	12.5	69
67	7	6	8821	84.05	61.3	-6	7.5	53.8
68	7	7	8822	85.4	58.2	-5.6	11	57
69	7	8	8823	105.6	80.2	-7.7	8.5	63
70	7	9	8824	148.35	102.75	14.35	6.5	49.2
71	7	10	8825	113.7	93.75	-5.8	8.5	51.2
72	8	1	8826	77.75	58.45	-6.35	7.5	60.6
73	8	2	8827	98.45	69.25	-6.2	10	62.2
74	8	3	8828	86.5	48.1	19.6	7.5	55.8
75	8	4	8829	104.3	73.85	-6.6	10	54.4
76	8	5	8830	76.5	43.05	3.4	10.5	59.8
77	8	6	8831	84	60.6	-16.15	9	56
78	8	7	8832	114.1	88.55	6	9	57.8
79	8	8	8833	91.1	51.75	5.6	6	51.2
80	8	9	8834	103.2	76.9	-1.35	10	57.6
81	8	10	8835	108.6	90.15	-11.05	9	49.8
82	9	1	8836	80.9	53.2	-27.85	11	62.4
83	9	2	8837	120.8	92.05	-5.85	9	60.4
84	9	3	8838	126.65	100.3	3.25	10	63.2
85	9	4	8839	79.25	57.5	-2.8	6.5	48.4
86	9	5	8840	85.55	58.65	-4.25	9	61.8
87	9	6	8841	143.4	118.95	-2.1	9.5	54.6
89	9	9	8844	60.65	44.3	-9.25	9.5	58.8
90	9	10	8845	102.4	86	-3.9	9.5	55.4
91	10	1	8846	71.5	45.65	3.35	11	68
92	10	2	8847	120.35	102.05	-9.6	10.5	59.2
93	10	3	8848	132.3	106.4	-3.25	9.5	56
94	10	4	8849	68.65	45.85	-3.7	8	56
95	10	5	8850	81.6	64.4	-12.7	7.5	55.6
96	10	7	8851	83.35	58	2.55	8.5	56
97	10	8	8852	96.05	68	0.6	9	59.2
98	10	9	8853	116.45	67.5	18	7.5	56
99	10	10	8854	114.45	92	-8.55	8	54.2
100	11	1	8855	121.75	96.2	-8.9	10.5	55.2
101	11	2	8856	67.55	49.55	-15.75	11.5	57.4
102	11	3	8857	90.55	65.25	-7.15	8.5	57.4
103	11	4	8858	65.35	51.95	-10.55	9	55.4
104	11	5	8859	108.8	86.85	-5.55	8	56
105	11	6	8861	99.4	73.85	-13.85	9	53.6
106	11	7	8862	90.9	61.25	-5.15	7	59
107	11	8	8863	95.55	67.3	-2.95	8	51.8
108	11	9	8864	163.75	130.8	-4.1	11	63
109	11	10	8865	94.5	58.7	2.75	8.5	49.8
111	12	4	8868	101.3	59.35	6.2	6.5	52.6
112	12	5	8869	80.35	58.35	-8.45	10.5	66
113	12	6	8870	100.75	79.25	-12.8	9	60.8
114	12	7	8871	113.2	95.3	-14.4	9	56.4
115	12	8	8872	92.45	80.75	-12.55	9.5	63.4
116	12	9	8873	82.6	60.7	-13	10	61.2
117	12	10	8874	85.8	64.55	-4.5	9	59
118	13	1	8875	76.25	54.35	-12.05	10	61
119	13	2	8876	86.45	61.7	-4.7	10.5	61.4
120	13	3	8877	73.6	65.1	-12.75	11	59.6
121	13	4	8878	120.8	92.7	0.2	11.5	61.8
122	13	5	8879	85.7	52.25	-0.5	10	57.2
123	13	6	8880	131.65	109.1	-9.9	11.5	66.6
124	13	7	8881	95.65	68.55	-2.15	9	59.2
125	13	8	8882	160.25	138.25	-10.7	11	61
126	13	9	8883	92.3	62.55	-4.6	9.5	57.6
127	13	10	8884	73.6	51.8	-8.05	7	51.8
128	14	1	8885	82.15	64.65	-8.3	7.5	56.6
129	14	2	8886	82.65	64.2	-9.9	9.5	56.4
130	14	3	8887	80.5	63.5	-10.1	10.5	59
131	14	4	8888	109.05	70.45	6	9.5	58.6
132	14	5	8889	103.15	68.35	0.7	8	56
133	14	6	8890	80.65	56.2	-8.7	9.5	49.2
134	14	8	8892	98.4	66.1	-9.8	9	57
135	14	10	8893	83.25	61.55	-2.4	9	62.8
136	15	1	8894	118.75	101.9	-9.35	11.5	60.4
138	15	3	8896	87.45	60.4	-6.15	7.5	57.2
139	15	4	8897	97.05	60.25	2.35	7.5	59.8
140	15	5	8898	143.45	123.65	-5.9	10.5	57.2
141	15	6	8899	101.7	83.1	-7.85	9	59
142	15	7	8900	115.3	79.35	2.05	11.5	62.6
143	15	8	8901	96.95	67.6	0.85	11	55.2
144	15	9	8902	115.25	106.15	-13.75	11	52.2
145	15	10	8903	96.85	78.25	-5.7	9	52.8
146	16	1	8904	87.85	55.4	-1.1	9	55.8
147	16	2	8905	91.2	68.8	-1.6	9.5	65.6
148	16	4	8907	92.8	72.45	-6.8	10	56.4
149	16	5	8908	115.9	106.05	-2.05	10.5	57.6
150	16	6	8909	123.9	100.25	-0.45	9.5	52
151	16	7	8910	105.3	92.65	-14.85	8.5	56.8
152	16	8	8911	110.7	76.3	-2.95	8.5	54.8
153	16	9	8912	99.95	81.7	-4.25	10	57.4
154	16	10	8913	85.3	54.85	1.4	8	60.6
155	17	1	8914	86.45	75.65	-11.1	7.5	44.8
156	17	2	8915	126.8	108	-11.9	9.5	62.4
157	17	3	8916	98.05	65.6	-5.15	10	65.8
158	17	4	8917	102.3	88.8	-12.3	11.5	76
159	17	5	8918	131.65	100.9	-3.1	10	53.4
160	17	6	8919	123.65	97.8	-7.9	7.5	52.4
161	17	7	8920	146.75	124.9	-1.25	9.5	50.2
162	17	8	8921	73.85	55.9	-10.6	7.5	50.2
163	17	9	8922	81.7	54.85	-28.6	9	57.2
164	17	10	8923	79.85	60.15	3.05	8.5	64.6
165	18	1	8924	120.95	95.65	-3.45	9	56.4
166	18	2	8925	96.85	78.3	-10.85	8.5	59
167	18	3	8926	92.35	52.95	13.1	8.5	65
168	18	5	8928	119.8	104.9	-17.35	9.5	53.4
169	18	6	8929	103.45	71.95	-0.15	10.5	52.4
170	18	7	8930	83.65	68.3	5.05	8	50.8
171	18	8	8931	85.45	71.6	-20.35	9.5	50.2
172	18	9	8932	72.15	50	-7.25	10	57.2
173	18	10	8933	175.3	141.95	1.3	10.5	59.8
174	19	1	8934	76.45	48.2	2.45	6.5	49.4
175	19	2	8935	128.3	107.15	-8.1	10	60.8
176	19	3	8936	75.4	53.1	-2.9	7	51.4
177	19	4	8937	161.6	127.35	-0.35	8.5	69.4
178	19	5	8938	92.05	59.7	4.9	9	63.2
179	19	6	8939	69.7	46	6.5	7	50.6
180	19	7	8940	107	80.85	-10.9	10.5	62.2
181	19	8	8941	117.55	90.4	-0.6	9.5	58.2
182	19	9	8942	127.9	103.4	-10.05	10	53.8
183	19	10	8943	85.7	62.6	-13	8	50.8
184	20	1	8944	107.9	75.2	3.7	9	56.4
185	20	2	8945	121.2	95.05	-5.2	10	64.2
186	20	3	8946	106.25	65.95	0.6	8.5	57.6
187	20	4	8947	108.75	70.1	11.45	9.5	65.2
188	20	6	8948	106.3	87.1	-12.1	8.5	52.6
189	20	7	8949	145.25	120.1	-2.8	10	62.2
190	20	8	8950	81.05	69.05	-15.7	10	57.8
191	20	10	8951	111.9	90.5	-2.65	10.5	58.2
192	21	1	8952	80.65	41.2	17.4	8	61.6
193	21	2	8953	76.8	52.55	-5.6	8	55
194	21	3	8954	83	53.95	3.45	8	58
195	21	4	8955	111.05	76.65	-4.3	8	54
196	21	5	8956	92.85	71.4	-10.65	9.5	56
197	21	6	8957	121.25	103.4	-7.85	9	51.4
198	21	7	8958	120.25	97.15	-12.95	10	57.6
199	21	8	8959	127.7	103.35	-2.1	7.5	52.2
200	21	9	8960	104.4	82.5	-7.05	8.5	49.4
201	22	1	8961	78.85	50.2	5.15	8.5	57.2
202	22	3	8963	86.5	55.7	1.45	9	73
203	22	4	8964	95.6	59.45	6.75	8.5	61.2
204	22	5	8965	81.6	47.8	1.2	8.5	59.6
205	22	6	8966	86.2	63.9	-7	10	61
206	22	7	8967	76	57.35	-17.65	8.5	56
207	22	8	8968	119.45	100.95	-12.9	9	54.8
208	22	9	8969	77.1	55.45	-3.45	8	54.2
209	22	10	8970	NA	NA	NA	NA	55
210	23	1	8971	75.05	52.4	-9.1	9	55.6
211	23	2	8972	69.05	60.85	-19.25	8.5	59.2
212	23	3	8973	93.9	58.8	4.95	6.5	54.4
213	23	4	8974	90	81.6	-11.9	11	74.2
214	23	5	8975	96.6	67.85	0.5	8.5	61.8
215	23	6	8976	93.7	74.65	-6.55	7.5	56.8
216	23	7	8977	100.95	81.95	-16.55	8	52.6
217	23	8	8978	73.75	40	9.95	7	53.6
218	23	9	8979	128.6	97.5	0.25	9.5	56.4
220	24	1	8981	72.6	57.5	-7.65	11	60.6
221	24	2	8982	80.7	62.15	-6.95	8.5	55.6
222	24	3	8983	102.7	70.65	7.9	6.5	51.2
223	24	4	8984	112.05	71.05	7.65	7.5	50.6
224	24	5	8985	128	104.8	-5.6	10	74.2
225	24	6	8986	105.35	66.4	5.35	10	57.6
226	24	7	8987	89.4	54.3	4.65	8	54.4
227	24	8	8988	80.9	55.8	-6.2	7	48.4
228	24	10	8989	94.75	65.85	-3.85	11.5	60.4
229	25	1	8990	102.5	86.5	-9.15	8.5	60.6
230	25	2	8991	93.2	56.05	4.65	8.5	65.2
231	25	3	8992	76.7	63.3	-9.4	8.5	58.2
232	25	4	8993	94.25	85.2	-14.05	11	66.4
233	25	5	8994	132.6	107.2	-4.25	9	59.6
234	25	6	8995	139.85	126.9	-14.95	11.5	57
235	25	7	8996	127.6	83.25	-1.1	10	51.2
236	25	8	8997	103.15	57.7	14.8	8	50.8
237	25	9	8998	123.5	95.9	-4.85	10	55.2
238	25	10	8999	118.1	89.65	-1.6	11.5	61.8
239	26	1	9000	126.6	102.6	-4.05	10	60.4
240	26	2	9001	86.3	62.9	-9.75	9.5	53.6
241	26	3	9002	88.45	55	-8.3	8	56.4
242	26	4	9003	89.3	76.4	-12.55	8	51.2
243	26	5	9004	127.7	97.75	-6.8	10	54
244	26	6	9005	76.8	51.75	-3.35	10	67
245	26	7	9006	91.95	73.6	-7.65	9.5	58.2
246	26	8	9007	80.1	53.9	-8.15	7.5	56
247	26	9	9008	152.95	131.25	-10.9	13	71.2
248	26	10	9009	109.9	83.65	-6	9.5	58.2
249	27	1	9010	79.5	54.55	0.1	10	68
250	27	2	9011	83.05	47.15	9.55	8.5	59.4
251	27	4	9013	88.75	60.5	2.05	10.5	60.6
252	27	5	9014	110.3	87.6	-11.1	11	73.6
253	27	7	9015	115.05	81	4.25	9.5	56.4
254	27	8	9016	126.25	105.4	-6.3	7	47.8
255	27	9	9017	96.1	70.3	-0.75	9.5	55.4
256	27	10	9018	85.65	74.3	-14.95	9	50
257	28	1	9019	82.5	55.35	0	7.5	54.2
258	28	2	9020	89.65	71.6	-2.95	8.5	54.6
259	28	3	9021	87.3	75.55	-9.65	10.5	56.2
260	28	4	9022	110.75	91.7	-13.35	9	53.4
261	28	5	9023	121.7	92.65	2.25	9.5	62
262	28	6	9024	107.35	75.9	4.8	10	68.4
263	28	7	9025	133.5	105	-7.55	7.5	50.6
264	28	8	9026	122.95	100.2	-16.1	8	49.8
265	28	9	9027	81.45	50.3	-4.7	7.5	55.2
266	28	10	9028	97.6	78.35	-12.05	8	50.2
267	29	1	9029	81.05	61.3	5.05	7.5	55.4
268	29	2	9030	122.9	90.3	11.05	8	56
269	29	3	9031	135.25	105.25	-4.8	10	61
270	29	4	9032	119	76	8.45	7.5	50
271	29	5	9033	74.85	50.75	-7.25	7	52
272	29	6	9034	114.4	95	-5.85	11.5	61.4
273	29	7	9035	80.1	55.9	-10.4	11.5	65.6
274	29	8	9036	114.6	101.5	-9.05	11	61
275	29	9	9037	131.35	103.9	-9.25	8.5	50.6
276	29	10	9038	130.6	108.3	-14.4	10	54.4
277	30	1	9039	94.25	68.35	-3.7	10.5	56.4
278	30	2	9040	135.1	56.3	-1.4	10	58.6
279	30	4	9041	93.2	75.2	-10.55	10.5	63.8
280	30	5	9043	106.25	84.35	-13.6	11.5	69
282	30	7	9045	91.15	69.65	-6.7	7	61.6
283	30	8	9046	130.55	109.05	-2.95	12	62
284	30	9	9047	88.45	76.05	-12.25	9	53.2
285	30	10	9048	90.1	62.25	-4.5	8.5	51.2
286	31	1	9049	78.25	58	-10.25	10	63.4
287	31	2	9050	92.65	65.5	-4.95	10	73.8
288	31	3	9051	86.85	76.25	-10.7	10	61.6
289	31	4	9052	83.45	52.1	2.65	12	72.4
290	31	5	9053	71.55	58.7	-18.55	12.5	73.2
291	31	6	9054	69.55	53.6	-1.7	9.5	72
292	31	9	9056	89.05	59.35	1.95	9	54.8
293	31	10	9057	126.4	54.15	7.45	7.5	47.6
294	32	1	9058	104.75	78.05	7.8	9.5	57.4
295	32	2	9059	63.55	50.5	-12.65	11.5	66.2
296	32	3	9060	81.85	62.45	-0.3	13	83.6
297	32	4	9144	92.1	65.55	0.35	13	81.6
298	32	5	9145	80.55	58.9	-5.5	10.5	71
299	32	6	9146	140.35	117	-9.75	10	60.6
300	32	7	9147	66.1	51.9	-10.6	12	77
301	32	8	9148	115.95	97.7	-16.25	11.5	63.6
302	32	9	9149	63.25	52.55	-6.3	11	60.6
303	32	10	9150	80.5	47.1	-1	7	62.2
304	33	1	9151	61.1	40.2	-1.6	10	73
305	33	2	9152	68.8	47.25	-6.3	11.5	64.2
306	33	3	9153	74.8	40.1	9.6	8	57
307	33	4	9154	72.6	37.2	8.8	7.5	60
308	33	5	9155	90.15	64.95	3.1	7.5	69.6
309	33	6	9156	94.65	70.55	-1.8	12.5	81.2
310	33	8	9158	108.5	66.65	0.45	8.5	57
311	33	9	9159	70.7	57	-9.65	11	68.2
312	33	10	9160	137.9	110.7	-1.45	11	61.6
313	34	2	9163	93.7	69.15	-4.55	10.5	78.4
314	34	4	9165	73.85	55.95	-3.3	13	93.6
315	34	5	9166	80.65	54.6	-3.8	11	69.2
316	34	6	9167	124.2	96.4	-2.5	10.5	70
317	34	7	9168	77.95	59.1	-10.25	9	74.8
318	34	8	9169	96.15	75.1	-9.1	9.5	62.8
319	34	9	9170	145.05	118.1	2.15	14	95.8
320	34	10	9171	84.65	55.45	1.1	9	69.4
321	35	1	9172	81.3	53.9	9	7	66.6
322	35	2	9173	69.85	46.65	-8.35	9.5	61.6
323	35	3	9174	95.15	64	2.45	12	75.2
324	35	4	9175	93.8	80.1	-14.1	11.5	71.8
325	35	5	9176	86.9	62	-13.2	10.5	77.2
326	35	6	9177	77.85	55.45	-5	13.5	90.4
327	35	7	9178	113.4	64.45	11.7	9.5	59.4
328	35	8	9179	115.25	93.25	-3.3	8	58.6
329	35	9	9180	88.6	67.35	-3.55	8	53.8
330	35	10	9181	103.7	93.2	-11.25	7.5	53.2
331	36	1	9182	89.85	58.7	7.75	11.5	86.8
332	36	2	9183	62.95	48.5	-6.7	7	59.8
333	36	4	9184	90.7	72.05	-9.85	11	68.8
334	36	5	9185	79.35	54.5	-4.85	11	75.2
335	36	6	9186	76	48.4	-7.2	11	97.6
336	36	9	9188	109.1	75.4	2.75	12	66
337	36	10	9190	103.1	87.25	-10	9.5	64.8
338	37	1	9191	102	62.4	5.1	9.5	83.3
339	37	2	9192	85.1	57.75	8.45	10	85
340	37	3	9193	69.1	38.6	7.05	8.5	72.4
341	37	4	9194	85	57.25	2.65	12.5	76.6
342	37	6	9198	119.8	87.15	5.3	11.5	83.8
343	37	7	9195	NA	NA	NA	NA	80.8
344	37	8	9199	119.2	106.7	-9.75	10.5	62.2
345	37	9	9200	75.35	51.5	-5.5	10	63.8
346	37	10	9201	86.45	57.55	-4.25	9.5	65.2
347	38	1	9202	76.5	36.5	11.65	10	88.4
348	38	2	9203	87.9	66.95	-4.1	8.5	83.6
349	38	3	9204	99.3	53.7	9.8	9.5	74.4
350	38	4	9205	76.6	46.45	2.3	8.5	66.6
351	38	5	9206	74.15	43.25	10.05	6	60.8
352	38	6	9207	86.6	66.1	-4.3	10	78
353	38	7	9208	74.65	40.2	10.6	8	71.2
354	38	8	9209	79.1	59.5	-14.35	8	59.2
355	38	9	9210	112.85	96.35	-10.75	10	57
356	38	10	9211	127.9	89	11.4	10.5	71.6
357	39	1	9212	76.95	51.95	3.2	6.5	68.2
358	39	2	9214	94.75	61	3.9	14	99.2
359	39	3	9215	66.6	49.7	-10.8	7	64
360	39	4	9216	79.55	61.75	-0.85	8.5	65.6
361	39	5	9217	63.6	42.1	-4.1	9	76
362	39	6	9218	88.25	62.55	-15.75	9.5	58.8
363	39	8	9221	86.65	54.65	-1.6	11	74.6
364	39	9	9222	103.15	94.5	-14.35	10.5	66.4
365	39	10	9223	76.8	51.75	-1.6	9	67.2
366	40	1	9224	83.45	55.3	-1.4	9.5	87.2
367	40	3	9226	108.25	79.1	5.4	8	60.2
368	40	4	9227	82.5	43.7	1.3	10.5	81.5
369	40	5	9228	128.35	103.75	-5.95	11	72.2
370	40	6	9229	114.95	69.25	1.95	8.5	67.5
371	40	7	9230	115.3	91.75	-4.25	10.5	72
372	40	8	9231	107.05	65.55	13.8	9	71.6
373	40	9	9233	77	47.6	-3.65	7.5	59
374	40	10	9234	68.65	40.25	3.55	9	57.2
375	41	1	9236	69.1	48.55	-7.1	12	93.5
376	41	2	9237	87.5	67.1	-4.3	9	76
377	41	3	9238	89.4	52.5	9.6	7	58.2
378	41	4	9239	79.75	67.75	-15.3	8.5	68.6
379	41	6	9240	101.85	85.55	-8.8	8.5	62
380	41	7	9242	121.95	90.6	1.15	9.5	62.8
381	41	8	9243	98.45	74.5	3.2	7.5	62.8
382	41	10	9244	69.3	43.75	-0.55	8	63.6
383	42	1	9245	64	46.15	-10.25	12	84.3
384	42	2	9246	83.4	41.9	9.9	7.5	77.5
385	42	3	9247	76.95	35.6	6.4	7	77.2
386	42	4	9248	100	70.55	1.85	12	75.8
387	42	5	9249	90.15	65.5	-4.1	9.5	65.2
388	42	6	9250	96.45	55.5	3.7	8.5	74
389	42	7	9251	83.05	50.1	7.35	8.5	79.8
390	42	8	9252	110.3	86.8	-1	9.5	68.6
391	42	9	9253	95.45	60.4	-0.35	11	74.6
392	42	10	9254	106.15	82.1	-1.45	10.5	62.8
393	43	2	9256	80	49.3	2.65	9	71.8
394	43	3	9257	138.95	110.1	9.8	10	69
395	43	4	9258	74.1	40.55	-0.3	8.5	70.6
396	43	5	9260	101.35	69.35	5.65	8	67.6
397	43	6	9261	129.25	99.9	-5.5	9	60.6
398	43	7	9262	132.15	107.65	-12.65	13.5	74.8
399	43	8	9264	74.95	71.5	-20.85	15.5	83.2
400	43	9	9265	116.55	64.25	22.1	7.5	61.8
401	43	10	9266	88.15	65.4	-8.35	10	70.2
402	44	1	9267	70.9	50.4	4.7	6	76.3
403	44	2	9268	82.35	57.95	-3.2	9.5	64.8
404	44	3	9269	95.25	62.75	7.55	9.5	77.6
405	44	4	9270	104.5	65	5.1	12	79
406	44	5	9271	66.5	45.7	-5.6	10	90
